# Supplementary material for: The Therapeutic Implications of Tea Polyphenols against Dopamine (DA) Neuron Degeneration in Parkinson’s Disease (PD)
Source: PubMed Central journal article supplement (PMC6721683; doi:10.3390/cells8080911), 2019-08-16
Supplement: cells-08-00911-s001.pdf [file cells-08-00911-s001.pdf]

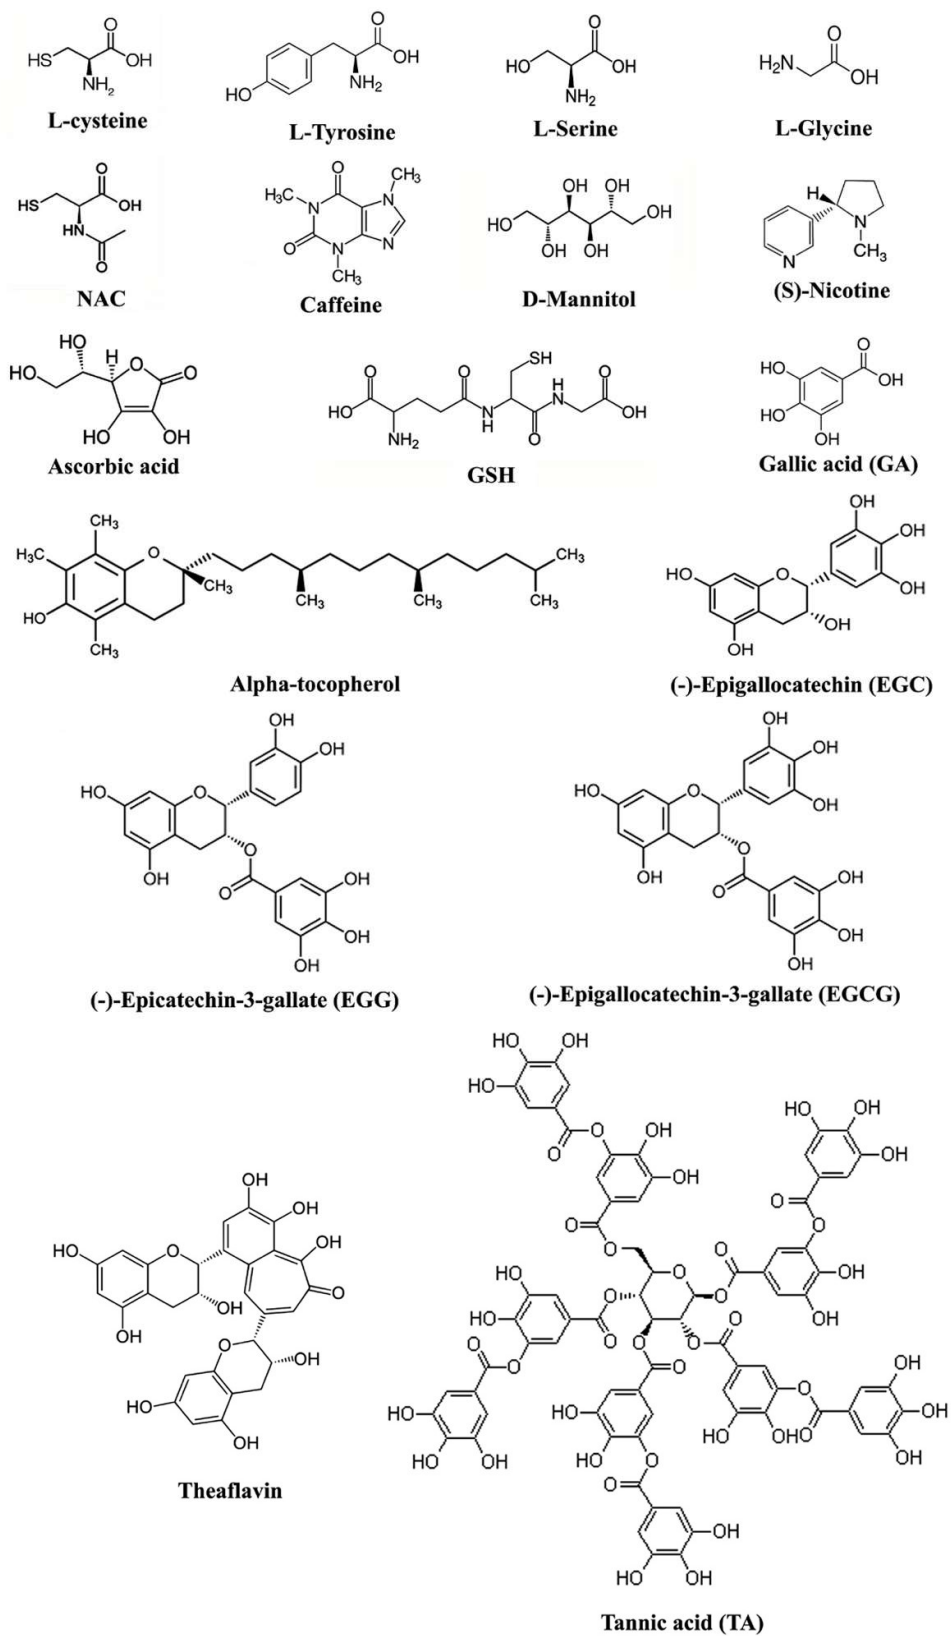

Supplementary Figure S1. Molecular structures of tea polyphenols and other agents.

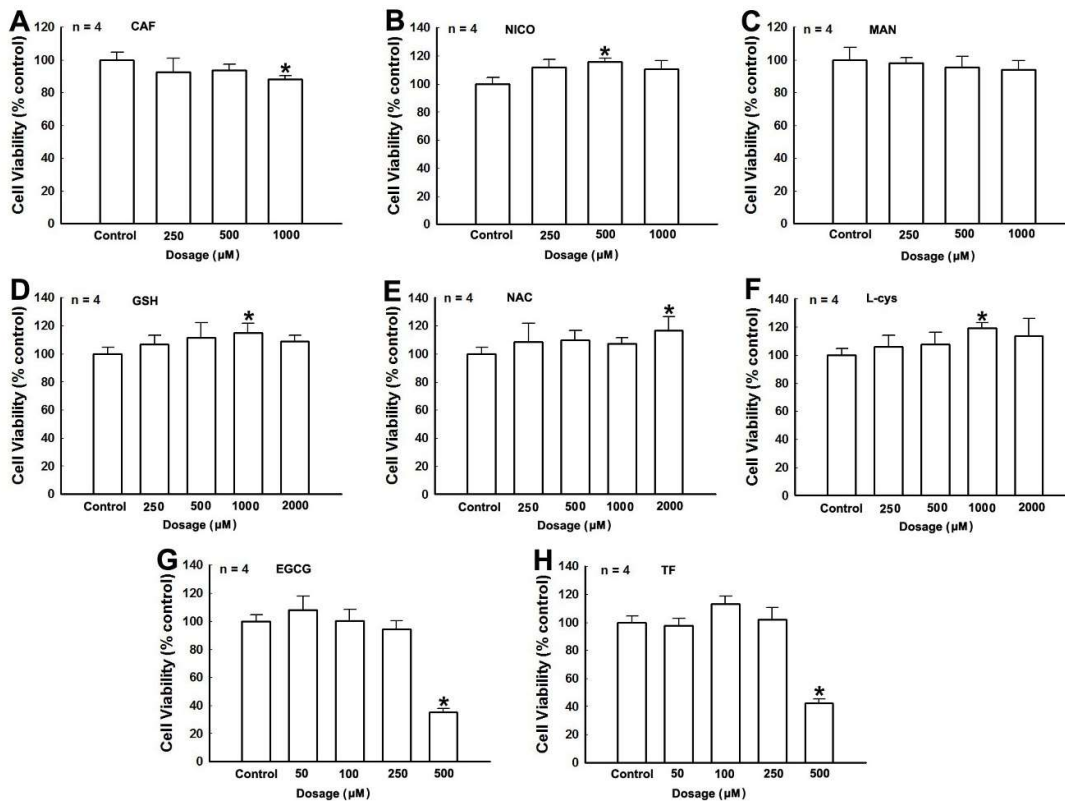

**Supplementary Figure S2.** Impacts of various agents on cell viability of PC12 cells. Dopaminergic PC12 cells are cultured in the presence or absence of different dosage of agents overnight before monitoring cell viability. Cells without any treatments are set as controls. Cell viability of PC12 treated with agents is expressed as % control. \*,  $p < 0.001$ , compared with cell viability of control cells.

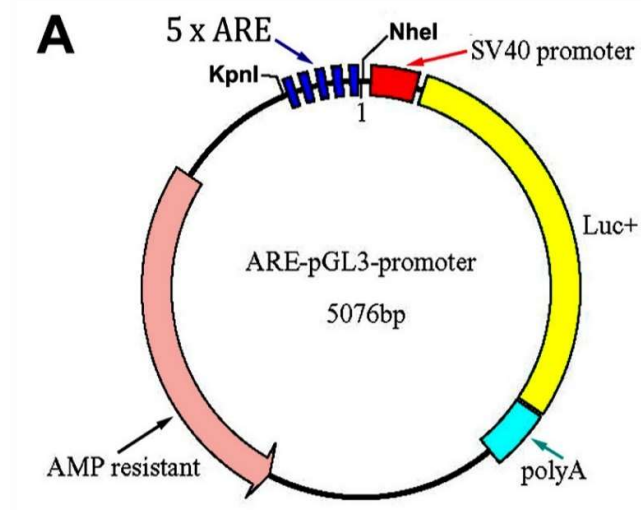

**Supplementary Figure S3.** Vector constructive map of ARE-pGL3promoter vector.

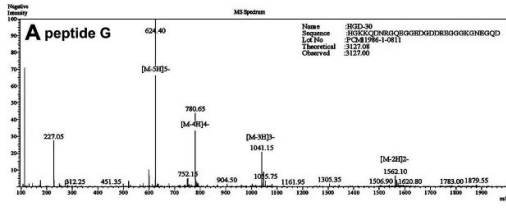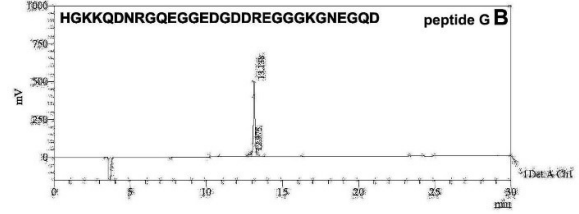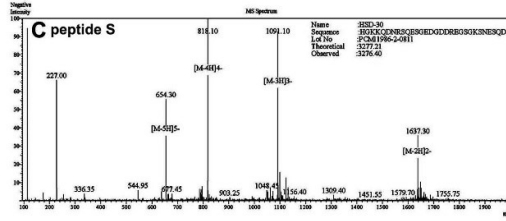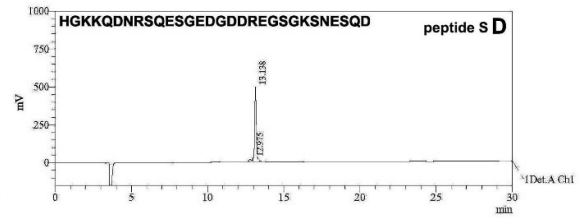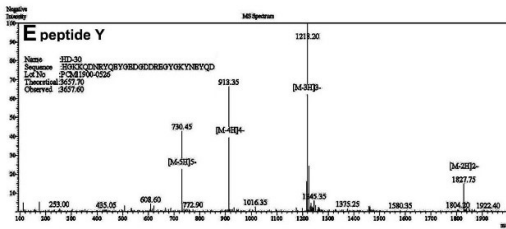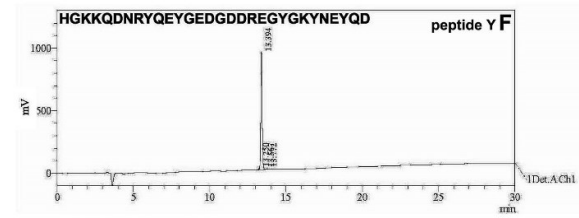

#### LC-MS-MS technique details

Dissolution method : 5%NH<sub>3</sub>H<sub>2</sub>O+8%ACN+87%H<sub>2</sub>O  
 Date Acquired : 2016/8/30 9:24:16  
 Injection Volume : 5ul  
 Interface :ESI  
 Nebulizing Gas Flow :1.50L/min  
 CDL Temp :250C  
 CDL Volt :0v  
 Block Temp :200  
 Prerod Bias :-4.5kv  
 Detector :-0.2kv  
 T.Flow :0.2ml/min  
 B.conc :50%H<sub>2</sub>O/50%MeOH

#### HPLC technique details

Pump A :0.1% trifluoroacetic in 100% water  
 Pump B :0.1% trifluoroacetic in 100% acetonitrile  
 Total Flow :1ml/min  
 Wavelength :214nm  
 Analytical column type :SHIMADZU Inertsil ODS-SP(4.6\*250mm\*5um)  
 Dissolution method :100%H<sub>2</sub>O  
 Inj. Volume :95ul

| Time  | Module     | Action | Value |
|-------|------------|--------|-------|
| 0.01  | Pumps      | B.Conc | 0     |
| 30.00 | Pumps      | B.Conc | 30    |
| 33.00 | Pumps      | B.Conc | 100   |
| 38.00 | Pumps      | B.Conc | 100   |
| 40.00 | Pumps      | B.Conc | 0     |
| 50.00 | Controller | Stop   |       |

**Supplementary Figure S4.** HPLC and LC-MS-MS analysis of 3 peptides synthesized. (A,B), LC-MS-MS and HPLC chromatographs of peptide G, (C,D), LC-MS-MS and HPLC chromatographs of peptide S, (E,F), LC-MS-MS and HPLC chromatographs of peptide Y, (G), LC-MS-MS technique details for analysis of peptides, (H), HPLC technique details for analysis of peptides.
